# Supplementary material for: Scenarios for Reducing Greenhouse Gas Emissions from Food Procurement for Public School Kitchens in Copenhagen
Source: MDPI journal article supplement (doi:10.3390/su151713002), 2023-08-29
Supplement: s1 [file s1]

**Supplementary Table S1:** Overview over nutritional composition of the scenarios.

|                 |                     | School A |               |      |                         | School B |               |      |                         | School C |               |      |                         |
|-----------------|---------------------|----------|---------------|------|-------------------------|----------|---------------|------|-------------------------|----------|---------------|------|-------------------------|
| Energy          | Baseline total (MJ) | 151738.2 |               |      |                         | 214387.4 |               |      |                         | 119078.0 |               |      |                         |
|                 | Baseline (MJ/kg)    | 7.2      |               |      |                         | 10.2     |               |      |                         | 6.5      |               |      |                         |
|                 | NB total (MJ)       | 144385.8 |               |      |                         | 206305.7 |               |      |                         | 111245.8 |               |      |                         |
|                 | NB (MJ/kg)          | 6.8      |               |      |                         | 9.8      |               |      |                         | 6.1      |               |      |                         |
|                 | HMF total (MJ)      | 154447.4 |               |      |                         | 217449.5 |               |      |                         | 121792.6 |               |      |                         |
|                 | HMF (MJ/kg)         | 7.3      |               |      |                         | 10.3     |               |      |                         | 6.6      |               |      |                         |
|                 | VEG total (MJ)      | 162630.5 |               |      |                         | 222416.9 |               |      |                         | 137080.4 |               |      |                         |
|                 | VEG (MJ/kg)         | 7.6      |               |      |                         | 10.5     |               |      |                         | 7.2      |               |      |                         |
|                 | DDG total (MJ)      | 134750.0 |               |      |                         | 162339.9 |               |      |                         | 125200.1 |               |      |                         |
|                 | DDG (MJ/kg)         | 6.4      |               |      |                         | 7.7      |               |      |                         | 6.8      |               |      |                         |
| Macro-nutrients |                     | Protein  | Carbo-hydrate | Fat  | Animal fat (excl. fish) | Protein  | Carbo-hydrate | Fat  | Animal fat (excl. fish) | Protein  | Carbo-hydrate | Fat  | Animal fat (excl. fish) |
|                 | Baseline            | 14.9     | 48.3          | 36.8 | 16.2                    | 12.6     | 41.2          | 46.2 | 18.8                    | 17.2     | 47.8          | 35.0 | 19.4                    |
|                 | NB                  | 15.7     | 50.5          | 33.8 | 12.1                    | 13.1     | 42.6          | 44.2 | 15.7                    | 18.4     | 50.9          | 30.7 | 13.9                    |
|                 | VEG                 | 15.4     | 55.6          | 29.1 | 8.2                     | 13.0     | 47.5          | 39.5 | 11.9                    | 17.9     | 58.1          | 23.9 | 7.7                     |
|                 | DDG                 | 14.6     | 50.5          | 34.9 | 10.6                    | 13.9     | 52.5          | 33.6 | 12.9                    | 14.6     | 55.2          | 30.2 | 9.8                     |

**Supplementary Table S2.** Average emission factors across databases and confidence intervals.

|                                         | Emission factor (kg CO <sub>2</sub> e/kg) |      |      | Mean<br>emission<br>factor kg<br>CO <sub>2</sub> e/kg) | Standard<br>deviation | Confidence<br>interval for<br>population<br>mean (+/- %) |
|-----------------------------------------|-------------------------------------------|------|------|--------------------------------------------------------|-----------------------|----------------------------------------------------------|
|                                         | UCPH                                      | DSK  | CFP  |                                                        |                       |                                                          |
| Beef & buffalo meat                     | 28.1                                      | 36.4 | 37.4 | 34.0                                                   | 5.1                   | 17%                                                      |
| Lamb/mutton & goat meat                 | 28.1                                      | 27.4 | 39.6 | 31.7                                                   | 6.8                   | 24%                                                      |
| Pork (pig meat)                         | 6.4                                       | 3.8  | 8.1  | 6.1                                                    | 2.1                   | 40%                                                      |
| Poultry (chicken, turkey)               | 4.4                                       | 2.4  | 6.7  | 4.5                                                    | 2.1                   | 54%                                                      |
| Butter                                  | 11.5                                      | 3.9  | 11.4 | 9.0                                                    | 4.4                   | 55%                                                      |
| Cheese                                  | 8.2                                       | 6.2  | 8.8  | 7.8                                                    | 1.4                   | 20%                                                      |
| Ice cream                               | 5.3                                       | 2.8  | 3.8  | 4.0                                                    | 1.2                   | 35%                                                      |
| Cream                                   | 5.3                                       | 2.1  | 6.9  | 4.8                                                    | 2.4                   | 57%                                                      |
| Milk (cow's milk)                       | 1.4                                       | 0.6  | 1.8  | 1.3                                                    | 0.6                   | 53%                                                      |
| Yogurt                                  | 2.5                                       | 1.4  | 2.8  | 2.2                                                    | 0.7                   | 38%                                                      |
| Eggs                                    | 3.4                                       | 0.9  | 3.9  | 2.7                                                    | 1.6                   | 68%                                                      |
| Fish (finfish)                          | 3.7                                       | 7.7  | 4.8  | 5.4                                                    | 2.1                   | 44%                                                      |
| Crustaceans (shrimp/prawns)             | 14.9                                      | 10.5 | 19.3 | 14.9                                                   | 4.4                   | 33%                                                      |
| Beans and pulses (dried)                | 1.0                                       | 1.3  | 0.9  | 1.1                                                    | 0.2                   | 21%                                                      |
| Peas                                    | 0.9                                       | 1.0  | 0.8  | 0.9                                                    | 0.1                   | 14%                                                      |
| Peanuts/groundnuts                      | 1.0                                       | 2.6  | 1.7  | 1.8                                                    | 0.8                   | 51%                                                      |
| Soybeans/Tofu                           | 1.0                                       | 1.3  | 2.2  | 1.5                                                    | 0.7                   | 49%                                                      |
| Grains/cereals (except rice)            | 0.7                                       | 1.5  | 1.6  | 1.3                                                    | 0.5                   | 40%                                                      |
| Corn (Maize)                            | 0.5                                       | 0.7  | 0.9  | 0.7                                                    | 0.2                   | 32%                                                      |
| Oats (Oatmeal)                          | 0.4                                       | 0.9  | 1.1  | 0.8                                                    | 0.4                   | 53%                                                      |
| Wheat/Rye (Bread, pasta, baked goods)   | 0.8                                       | 0.9  | 1.9  | 1.2                                                    | 0.6                   | 55%                                                      |
| Rice                                    | 2.7                                       | 1.3  | 4.3  | 2.7                                                    | 1.5                   | 63%                                                      |
| Tree nuts and seeds                     | 0.9                                       | 3.3  | 2.4  | 2.2                                                    | 1.2                   | 62%                                                      |
| Soy milk                                | 0.6                                       | 0.3  | 0.4  | 0.4                                                    | 0.2                   | 46%                                                      |
| Fruits (misc.)                          | 0.4                                       | 1.6  | 0.4  | 0.8                                                    | 0.7                   | 97%                                                      |
| Apples                                  | 0.3                                       | 0.7  | 0.3  | 0.4                                                    | 0.2                   | 52%                                                      |
| Bananas                                 | 0.8                                       | 1.0  | 0.7  | 0.8                                                    | 0.1                   | 18%                                                      |
| Berries                                 | 0.8                                       | 0.9  | 1.1  | 0.9                                                    | 0.2                   | 22%                                                      |
| Citrus Fruit                            | 0.3                                       | 0.9  | 0.4  | 0.5                                                    | 0.3                   | 65%                                                      |
| Cabbages and other Brassicas (Broccoli) | 0.3                                       | 0.4  | 0.6  | 0.4                                                    | 0.1                   | 35%                                                      |
| Tomatoes                                | 0.9                                       | 1.7  | 1.0  | 1.2                                                    | 0.5                   | 44%                                                      |
| Root Vegetables                         | 0.2                                       | 0.4  | 0.3  | 0.3                                                    | 0.1                   | 20%                                                      |
| Onions and Leeks                        | 0.2                                       | 1.1  | 0.3  | 0.6                                                    | 0.5                   | 97%                                                      |
| Other vegetables                        | 0.6                                       | 0.8  | 0.6  | 0.7                                                    | 0.1                   | 17%                                                      |
| Potatoes                                | 0.2                                       | 0.4  | 0.4  | 0.3                                                    | 0.1                   | 32%                                                      |
| Cassava and Other Roots                 | 0.5                                       | 1.4  | 0.4  | 0.7                                                    | 0.5                   | 82%                                                      |
| Sugars and sweeteners                   | 1.0                                       | 2.0  | 1.5  | 1.5                                                    | 0.5                   | 36%                                                      |
| Vegetable oils (misc.)                  | 1.9                                       | 3.6  | 3.7  | 3.1                                                    | 1.0                   | 38%                                                      |
| Sunflower (Oil)                         | 1.7                                       | 2.5  | 2.1  | 2.1                                                    | 0.4                   | 21%                                                      |
| Rapeseed/canola (Oil)                   | 1.9                                       | 3.8  | 3.2  | 3.0                                                    | 1.0                   | 38%                                                      |
| Olives (Oil)                            | 3.2                                       | 3.8  | 5.5  | 4.2                                                    | 1.2                   | 32%                                                      |
| Barley (Beer)                           | 0.8                                       | 1.6  | 0.9  | 1.1                                                    | 0.4                   | 44%                                                      |
| Wine Grapes (Wine)                      | 1.1                                       | 1.3  | 1.1  | 1.2                                                    | 0.1                   | 10%                                                      |
| Cocoa                                   | 2.8                                       | 4.1  | 10.5 | 5.8                                                    | 4.1                   | 81%                                                      |
| Coffee                                  | 3.9                                       | 3.5  | 16.7 | 8.0                                                    | 7.5                   | 106%                                                     |
| Stimulants & Spices (misc.)             | 1.2                                       | 1.9  | 9.4  | 4.2                                                    | 4.5                   | 122%                                                     |
